# Supplementary material for: PTSD is associated with neuroimmune suppression: evidence from PET imaging and postmortem transcriptomic studies
Source: PubMed Central journal article supplement (PMC7217830; doi:10.1038/s41467-020-15930-5), 2020-05-12
Supplement: 41467_2020_15930_MOESM1_ESM.pdf [file 41467_2020_15930_MOESM1_ESM.pdf]

**Supplementary Information**

**PTSD is associated with neuroimmune suppression: Evidence from PET imaging and  
postmortem transcriptomic studies**

Bhatt et al.

**Supplementary Figure 1:** [ $^{11}\text{C}$ ]PBR28  $V_T$  across non-primary regions in PTSD and control groups. A pattern of lower [ $^{11}\text{C}$ ]PBR28  $V_T$  in PTSD was apparent but not statistically significant ( $n = 23$  PTSD,  $n = 26$  control:  $p = 0.41$ ) across remaining brain regions. Group differences were assessed using MANOVA. Displayed [ $^{11}\text{C}$ ]PBR28  $V_T$  values are adjusted for genotype and sex, with group-wise mean indicated by black point. CAU: caudate, PUT: putamen, FC: frontal cortex, OFC: orbitofrontal cortex, OC: occipital cortex, PC: parietal cortex, TC: temporal cortex, CER: cerebellum, THA: thalamus

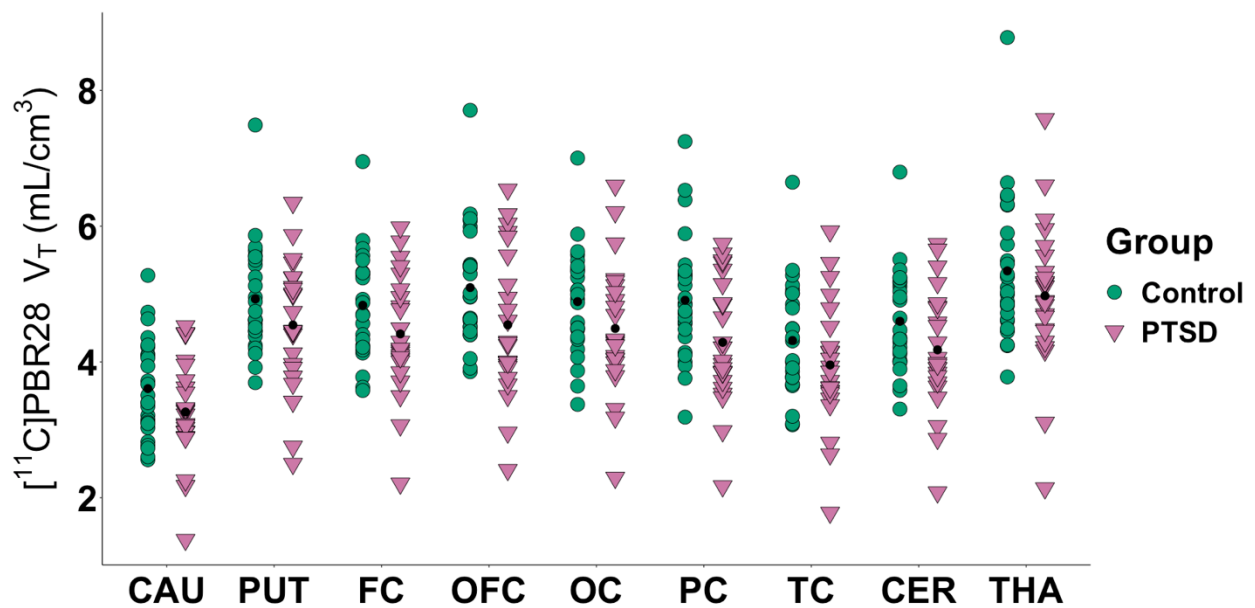

**Supplementary Table 1: [<sup>11</sup>C]PBR28 V<sub>T</sub> across regions in PTSD and Control.**

| Region                      | Control      |             | PTSD         |             |
|-----------------------------|--------------|-------------|--------------|-------------|
|                             | HAB (n = 17) | MAB (n = 9) | HAB (n = 18) | MAB (n = 5) |
| <b>Amygdala*</b>            | 5.1 ± 0.9    | 2.6 ± 0.6   | 4.6 ± 1.1    | 3.1 ± 1.1   |
| <b>Anterior Cingulum*</b>   | 5.0 ± 0.9    | 2.5 ± 0.6   | 4.3 ± 1.0    | 2.9 ± 0.9   |
| <b>Hippocampus*</b>         | 4.7 ± 0.8    | 2.5 ± 0.6   | 4.2 ± 1.0    | 3.0 ± 1.0   |
| <b>Insula*</b>              | 5.1 ± 0.8    | 2.5 ± 0.5   | 4.3 ± 1.0    | 2.8 ± 0.8   |
| <b>Ventromedial PFC*</b>    | 5.1 ± 0.8    | 2.6 ± 0.5   | 4.3 ± 0.9    | 2.9 ± 0.8   |
| <b>Caudate</b>              | 3.9 ± 0.8    | 2.2 ± 0.7   | 3.4 ± 0.8    | 2.6 ± 0.8   |
| <b>Putamen</b>              | 4.7 ± 0.9    | 2.4 ± 0.6   | 4.0 ± 0.9    | 3.0 ± 1.2   |
| <b>Frontal Cortex</b>       | 5.1 ± 0.8    | 2.8 ± 0.6   | 4.5 ± 0.9    | 3.1 ± 0.9   |
| <b>Orbitofrontal Cortex</b> | 5.2 ± 0.8    | 2.8 ± 0.5   | 4.6 ± 1.1    | 3.1 ± 0.9   |
| <b>Occipital Cortex</b>     | 5.3 ± 0.9    | 3.1 ± 0.6   | 4.6 ± 1.1    | 3.3 ± 1.1   |
| <b>Parietal Cortex</b>      | 5.2 ± 1.0    | 2.8 ± 0.5   | 4.4 ± 1.0    | 3.1 ± 0.9   |
| <b>Temporal Cortex</b>      | 4.9 ± 0.8    | 2.7 ± 0.6   | 4.3 ± 1.0    | 3.0 ± 0.9   |
| <b>Cerebellum</b>           | 5.2 ± 0.8    | 2.7 ± 0.6   | 4.6 ± 1.0    | 3.1 ± 1.0   |
| <b>Thalamus</b>             | 5.6 ± 1.1    | 2.7 ± 0.8   | 5.0 ± 1.2    | 3.1 ± 0.9   |
| <b>Whole Brain</b>          | 4.8 ± 0.8    | 2.6 ± 0.4   | 4.2 ± 0.9    | 2.8 ± 0.7   |
| <b>Composite</b>            | 5.0 ± 0.8    | 2.5 ± 0.6   | 4.4 ± 1.0    | 2.9 ± 0.9   |

*\*a priori regions of interest used to compute Composite V<sub>T</sub>*

Values of [<sup>11</sup>C]PBR28 V<sub>T</sub> reported as mean ± SD for high affinity (HAB) and medium affinity binders (MAB) within control and PTSD groups.

**Supplementary Figure 2:** Prefrontal-limbic TSPO availability in PTSD group stratified by median PTSD severity into high- (filled triangles) and low-severity (empty triangles) of PTSD reveals step-wise relationship between lower TSPO and severity of PTSD most apparent in ACC, insula, and vmPFC. Prefrontal-limbic TSPO availability was significantly lower ( $F_{5,29} = 3.34, p = 0.021$ ) in the PTSD subgroup with high severity ( $n = 12$ ) compared to control ( $n = 26$ ): 19% lower in ACC ( $p = 0.022$ ), 21% lower in insula ( $p = 0.009$ ), and 22% lower in vmPFC ( $p = 0.005$ ). Group differences were assessed using MANOVA and within-ROI comparisons assessed using ANOVA. Displayed [ $^{11}\text{C}$ ]PBR28  $V_T$  values are adjusted for genotype and sex, with group-wise mean indicated by black point. \*\* $p < 0.01$ , \* $p < 0.05$

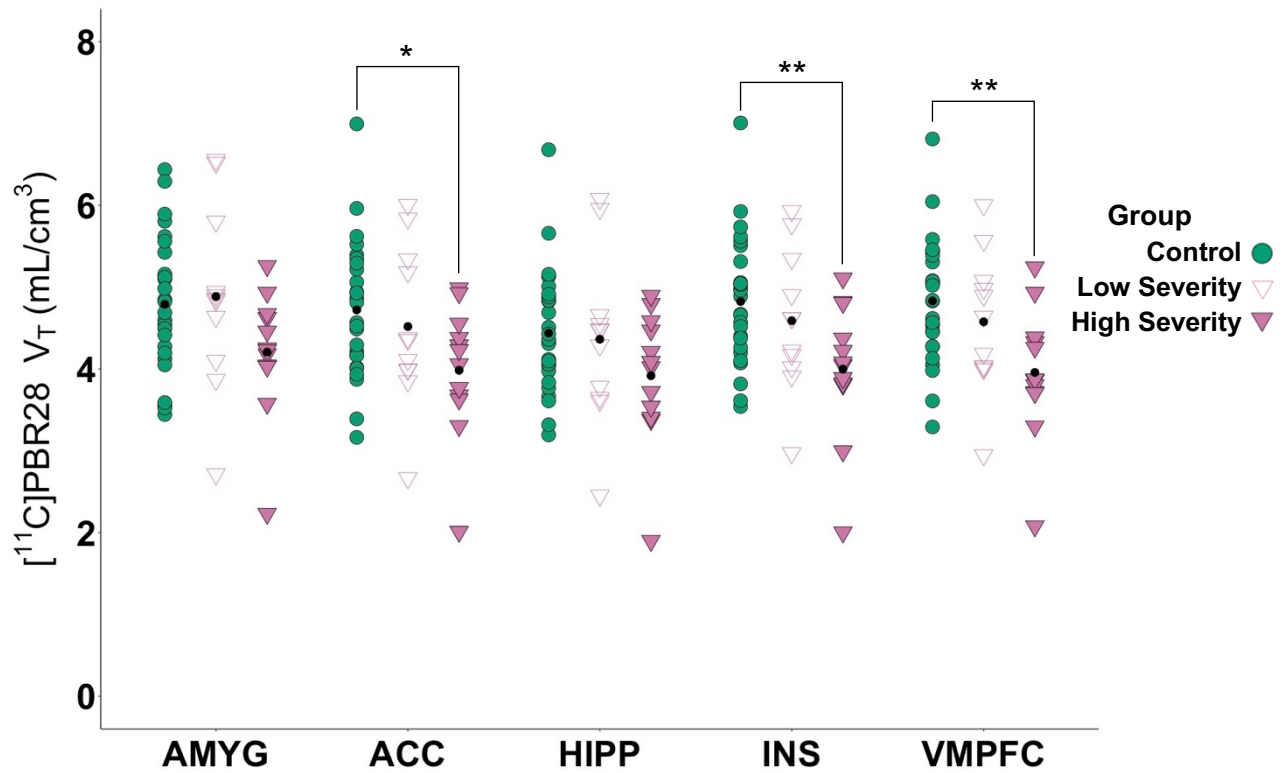

**Supplementary Figure 3: TSPO availability distributed across HAB and MAB status**

determined by rs6971 genotype. **a** Individuals with MAB status ( $n = 5$  PTSD,  $n = 9$  controls) have lower [ $^{11}\text{C}$ ]PBR28  $V_T$  than individuals with HAB status ( $n = 18$  PTSD,  $n = 17$  controls) regardless of PTSD vs. control group status. **b** [ $^{11}\text{C}$ ]PBR28  $V_T$  values from excluded outliers (solid black) are shown, consistent with being outside of 3 SD from the mean within the HAB subgroup (black outline). PTSD ( $n = 24$ ) vs. control group ( $n = 27$ ) showed a trend-level difference ( $p = 0.062$ ) when outliers were not excluded. Group differences were assessed using MANOVA. Displayed are [ $^{11}\text{C}$ ]PBR28  $V_T$  values with subgroup-wise mean indicated by black point.  $^{\wedge}p < 0.10$

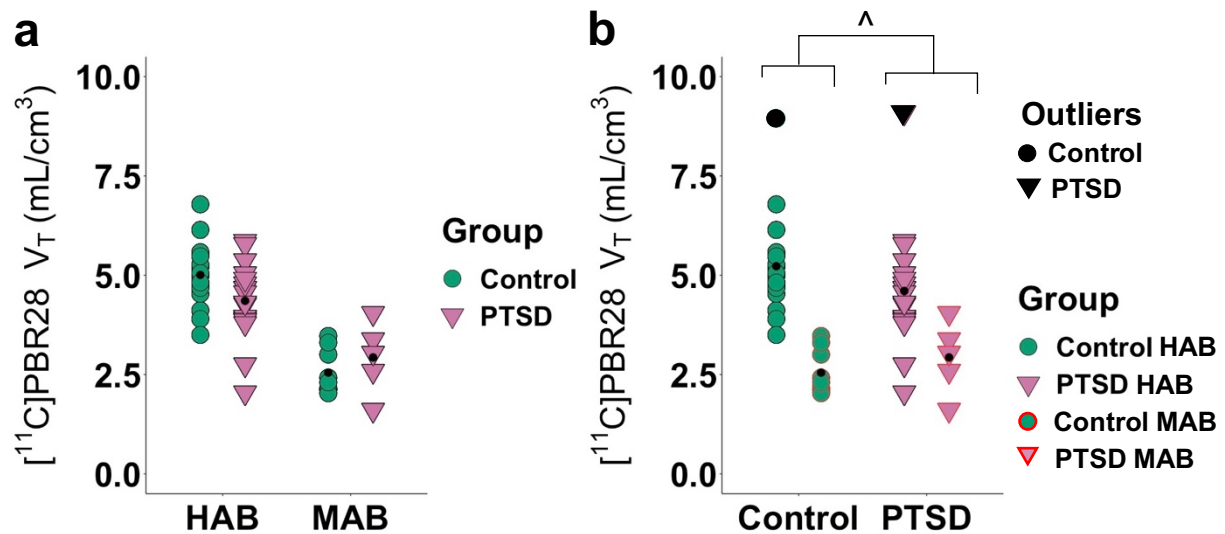

**Supplementary Figure 4:** Pro-inflammatory cytokine IFN- $\gamma$  was positively associated with prefrontal-limbic TSPO availability. **a.** A positive directional, but non-significant, association between [ $^{11}\text{C}$ ]PBR28  $V_T$  and IFN- $\gamma$  is apparent in the PTSD group ( $n = 16$ ,  $p = 0.17$ ). Displayed [ $^{11}\text{C}$ ]PBR28  $V_T$  values are adjusted for genotype and sex. **b.** Within controls ( $n = 20$ ), [ $^{11}\text{C}$ ]PBR28  $V_T$  was negatively associated with IFN- $\gamma$  ( $R^2 = 0.77$ ,  $p < 0.001$ ;  $\beta = -0.65$ ,  $p = 0.031$ ), though this association was not significant after FDR correction. Coefficient of multiple correlations and standardized coefficients were assessed from linear regressions. Displayed [ $^{11}\text{C}$ ]PBR28  $V_T$  values are adjusted for genotype, with gray shading indicating 95% confidence intervals.

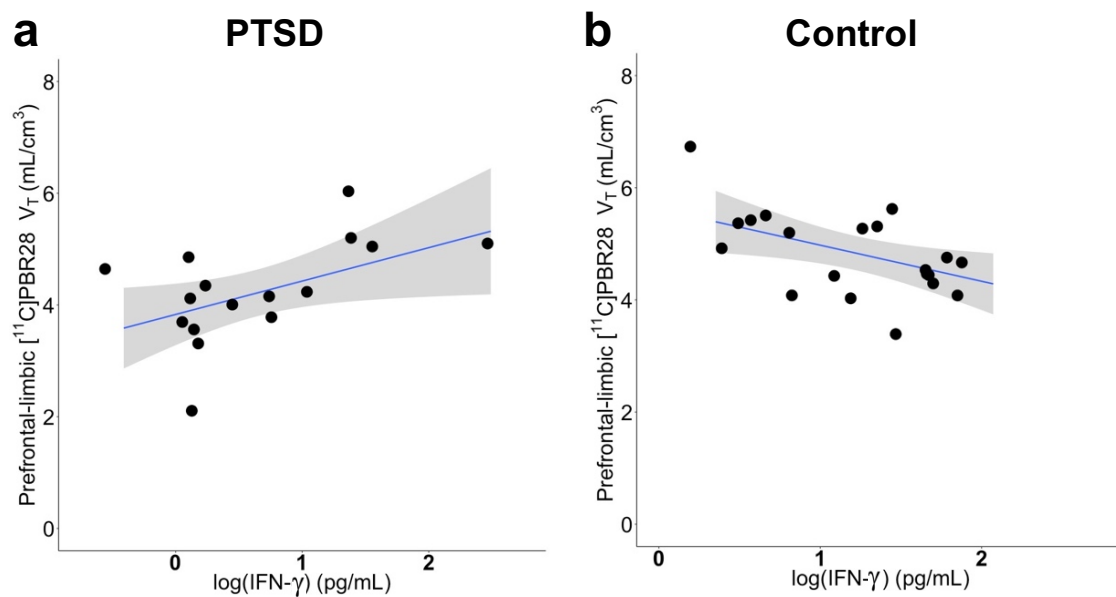

**Supplementary Table 2:** Exploratory regression analysis of cytokine levels in relation to prefrontal-limbic TSPO availability.

| Cytokines                         | All         |       | Control     |       | PTSD        |       |
|-----------------------------------|-------------|-------|-------------|-------|-------------|-------|
|                                   | $\beta$ (n) | p     | $\beta$ (n) | p     | $\beta$ (n) | p     |
| <b>Pro-inflammatory</b>           |             |       |             |       |             |       |
| Interleukin-1 $\beta$             | 2.16 (29)   | 0.067 | -1.90 (14)  | 0.097 | 2.49 (15)   | 0.058 |
| Interleukin-6                     | 0.11 (36)   | 0.59  | -0.23 (19)  | 0.35  | 0.17 (17)   | 0.63  |
| Tumor necrosis factor- $\alpha$   | -1.60 (35)  | 0.16  | -1.73 (19)  | 0.095 | 1.43 (16)   | 0.18  |
| Interferon- $\gamma$ <sup>^</sup> | -0.64 (36)  | 0.046 | -0.65 (20)  | 0.031 | 0.60 (16)   | 0.17  |
| Monocyte chemotactic protein-1    | 0.93 (37)   | 0.13  | 1.01 (20)   | 0.18  | 0.51 (17)   | 0.60  |
| Interleukin-8                     | -0.46 (37)  | 0.22  | -0.39 (20)  | 0.27  | 0.32 (17)   | 0.45  |
| <b>Anti-inflammatory</b>          |             |       |             |       |             |       |
| Interleukin-10                    | -0.38 (34)  | 0.48  | -0.87 (17)  | 0.18  | 0.15 (17)   | 0.76  |

<sup>^</sup>p < 0.05, not surviving FDR correction for multiple comparisons

Standardized coefficients were assessed using linear regression.

**Supplementary Table 3:** Cytokine levels in PTSD vs. control group.

| <b>Cytokines</b>                | <b>Control</b>       | <b>PTSD</b>          | <b>p-value</b> |
|---------------------------------|----------------------|----------------------|----------------|
|                                 | <b>Mean ± SD (n)</b> | <b>Mean ± SD (n)</b> |                |
| <b>Pro-inflammatory</b>         |                      |                      |                |
| Interleukin-1 $\beta$           | 1.3 ± 0.6 (14)       | 1.2 ± 0.6 (15)       | 0.67           |
| Interleukin-6                   | 14.9 ± 27.6 (19)     | 9.4 ± 19.5 (17)      | 0.49           |
| Tumor necrosis factor- $\alpha$ | 10.6 ± 4.5 (19)      | 9.0 ± 5.3 (16)       | 0.35           |
| Interferon- $\gamma$            | 33.3 ± 33.6 (20)     | 27.4 ± 76.0 (16)     | 0.74           |
| Monocyte chemotactic protein-1  | 432.3 ± 222.9 (20)   | 426.6 ± 242.2 (17)   | 0.94           |
| Interleukin-8                   | 32.0 ± 43.0 (20)     | 12.7 ± 20.7 (17)     | 0.086          |
| <b>Anti-inflammatory</b>        |                      |                      |                |
| Interleukin-10                  | 7.2 ± 8.8 (17)       | 6.2 ± 7.0 (17)       | 0.68           |

*P*-values are derived from two-sided independent samples t-tests.



**Supplementary Table 4:** Details of psychotropic medication use.

| <b>Subject</b> | <b>Medication- dose/frequency</b>                                                                                        |
|----------------|--------------------------------------------------------------------------------------------------------------------------|
| 1              | Prozac- 60 mg daily<br>Trazodone- 150 mg nightly<br>Klonopin- 0.5 mg nightly (did not take for 2 nights before the scan) |
| 2              | Citalopram- dose not available, daily<br>Trazodone- 25 mg prn                                                            |
| 3              | Ambien- 2.5 mg nightly                                                                                                   |
| 4              | Pristiq- 100 mg daily<br>Trazodone- 100 mg nightly<br>Klonopin - 1 mg twice daily                                        |
| 5              | Bupropion- 350 mg daily                                                                                                  |

**Supplementary Table 5:** Demographics Summary of Postmortem Tissue.

| <b>Variable</b>      | <b>Control (n = 22)</b> | <b>PTSD (n = 22)</b> |          |                |
|----------------------|-------------------------|----------------------|----------|----------------|
|                      | <b>Mean ± SD</b>        | <b>Mean ± SD</b>     | <b>t</b> | <b>p-value</b> |
| Age at Death (years) | 48 ± 12                 | 46 ± 11              | 0.5      | 0.6            |
| Sex (% female)       | 50                      | 50                   | -        | -              |
| Race (% Caucasian)   | 77                      | 82                   | -        | -              |
| PMI                  | 18.8 ± 6.8              | 16.1 ± 5.6           | 1.6      | 0.2            |
| pH                   | 6.5 ± 0.3               | 6.5 ± 0.4            | 0.5      | 0.7            |
| RIN                  | 7.5 ± 1.0               | 7.6 ± 1.2            | 0.4      | 0.7            |

Values are mean ± SD unless otherwise specified. *P*-values are derived from two-sided independent samples t-tests. PMI: Postmortem interval, RIN: RNA integrity number

**Supplementary Table 6:** Comorbid diagnoses, manner, and cause of death of control group.

| <b>Subject</b> | <b>DSM-IV diagnoses</b> | <b>Manner of death</b> | <b>Cause of death</b>            |
|----------------|-------------------------|------------------------|----------------------------------|
| 1              | None                    | Natural                | Pulmonary embolism               |
| 2              | None                    | Accidental             | Peritonitis                      |
| 3              | None                    | Natural                | Pulmonary embolism               |
| 4              | None                    | Accidental             | Trauma                           |
| 5              | None                    | Natural                | Pulmonary embolism               |
| 6              | None                    | Natural                | Congestive heart failure         |
| 7              | None                    | Undetermined           | Undetermined                     |
| 8              | None                    | Natural                | ASCVD                            |
| 9              | None                    | Natural                | Cardiac tamponade                |
| 10             | None                    | Natural                | ASCVD                            |
| 11             | None                    | Natural                | ASCVD                            |
| 12             | None                    | Natural                | Pulmonary embolism               |
| 13             | None                    | Natural                | ASCVD                            |
| 14             | None                    | Natural                | Acute endocarditis               |
| 15             | None                    | Natural                | Pulmonary embolism               |
| 16             | None                    | Natural                | Interstitial myocardial fibrosis |
| 17             | None                    | Natural                | Myocardial infarct               |
| 18             | None                    | Accidental             | Trauma                           |
| 19             | None                    | Natural                | ASCVD                            |
| 20             | None                    | Natural                | ASCVD                            |
| 21             | None                    | Accidental             | Drowning                         |
| 22             | None                    | Accidental             | Trauma                           |

ASCVD: atherosclerotic cardiovascular disease

**Supplementary Table 7:** Comorbid diagnoses, manner, and cause of death of PTSD group.

| <b>Subject</b> | <b>DSM-IV diagnoses</b> | <b>Manner of death</b> | <b>Cause of death</b>                |
|----------------|-------------------------|------------------------|--------------------------------------|
| 1              | PTSD; ADR; ODC          | Accidental             | Drug overdose                        |
| 2              | PTSD; ADR               | Natural                | Airway obstruction                   |
| 3              | PTSD                    | Natural                | ASCVD                                |
| 4              | PTSD; ODC               | Accidental             | Drug overdose                        |
| 5              | PTSD; ADC; OAC          | Natural                | ASCVD                                |
| 6              | PTSD; ADC               | Accidental             | Trauma                               |
| 7              | PTSD                    | Suicide                | Incised wounds                       |
| 8              | PTSD; ODC; ODR          | Accidental             | Drug overdose                        |
| 9              | PTSD; ADC; ODC          | Natural                | ASCVD                                |
| 10             | PTSD; ADC               | Natural                | ASCVD                                |
| 11             | PTSD; AAC               | Accidental             | Trauma                               |
| 12             | PTSD; ADC; ODR; OAR     | Natural                | Cardiomegaly                         |
| 13             | PTSD; AAR               | Natural                | ASCVD                                |
| 14             | PTSD; AAR               | Natural                | Arrhythmogenic ventricular dysplasia |
| 15             | PTSD; ADR; ODR          | Natural                | Pulmonary embolism                   |
| 16             | PTSD; ADR; OAR          | Undetermined           | Drug overdose                        |
| 17             | PTSD; ADC; OAC; OAR     | Accidental             | Trauma                               |
| 18             | PTSD; AAR; ODR          | Natural                | Valvular heart disease               |
| 19             | PTSD; ADC; ODC; OAR     | Natural                | ASCVD                                |
| 20             | PTSD; ADC; ODR; OAC     | Accidental             | Pulmonary embolism                   |
| 21             | PTSD; ADC               | Natural                | Complications from alcoholism        |
| 22             | PTSD                    | Suicide                | Drug overdose                        |

AAC: alcohol abuse (current at time of death); AAR: alcohol abuse (in remission at time of death); ADC: alcohol dependence (current at time of death); ADR: alcohol dependence (in remission at time of death); ASCVD: atherosclerotic cardiovascular disease; OAC: other substance abuse (current at time of death); OAR: other substance abuse (remission at time of death); ODC: other substance dependence (current at time of death); ODR: other substance dependence (in remission at time of death)

## Supplementary Methods

[<sup>11</sup>C]PBR28 was labeled either with [<sup>11</sup>C]methyl triflate or [<sup>11</sup>C]methyl iodide synthesized using the TRACERLab™ FxC automated synthesis module (GE Medical Systems) or the AutoLoop™ (Bioscan Inc., Washington, D.C.) module, respectively, with [<sup>11</sup>C]methyl iodide generation achieved via TRACERLab™ Fx-Mel. High-performance liquid chromatography (HPLC) coupled to a gamma detector were used to determine [<sup>11</sup>C]PBR28 chemical and radiochemical purity. [<sup>11</sup>C]PBR28 specific activity was determined from counting of an aliquot in a dose calibrator and from the mass measured by HPLC compared to a cold standard calibration curve. Identity of [<sup>11</sup>C]PBR28 was confirmed by co-injection of cold PBR28.

## **Supplementary Materials Appendix:**

### **Traumatic Stress Brain Research Group**

Matthew J. Friedman MD, PhD <sup>1,2</sup> (Director), Victor E. Alvarez MD <sup>1,3,4</sup>, David Benedek MD <sup>9</sup>, Christopher Brady PhD <sup>1,3,4</sup>, Dianne Cruz MS <sup>7</sup>, David A Davis PhD <sup>10</sup>, Ronald S. Duman PhD <sup>1,5,6</sup>, Matthew J. Girgenti <sup>5,6</sup> PhD, Paul E. Holtzheimer MD <sup>1,2</sup>, Bertrand R. D. Huber MD <sup>1,3,4</sup>, Terence M. Keane PhD <sup>1,3,4</sup>, Neil Kowell MD <sup>3,4</sup>, John H. Krystal MD <sup>1,5,6</sup>, Mark W. Logue PhD <sup>1,3,4</sup>, Ann McKee MD <sup>3,4</sup>, Brian Marx PhD <sup>1,3,4</sup>, Deborah Mash PhD <sup>14</sup>, Mark W. Miller PhD <sup>1,3,4</sup>, William K. Scott PhD <sup>10</sup>, Thor Stein MD <sup>3,4</sup>, PhD, Robert Ursano MD <sup>9</sup>, Douglas E. Williamson PhD <sup>7,8</sup>, Erika J. Wolf PhD <sup>1,3,4</sup>, Keith A. Young PhD <sup>11,12,13</sup>

1. National Center for PTSD
2. Department of Psychiatry, Geisel School of Medicine at Dartmouth
3. Departments of Psychiatry, Neurology, Biomedical Genetics, Biostatistics and/or Pathology & Laboratory Science, Boston University
4. VA Boston Healthcare System
5. Department of Psychiatry, Yale University School of Medicine
6. VA Connecticut Healthcare System
7. Department of Psychiatry & Behavioral Sciences, Duke University Medical Center
8. Durham VA Healthcare System
9. Department of Psychiatry, Uniformed Services University of Health Sciences
10. Departments of Human Genetics, Public Health Sciences and/or Neurology, University of Miami Miller School of Medicine
11. Central Texas Veterans Health Care System
12. VISN17 Center of Excellence for Research on Returning War Veterans
13. Baylor Scott & White and Texas A&M COM Psychiatry
14. Department of Biomedical Sciences, Nova Southeastern University
